# Supplementary material for: Gastric microbiota and predicted gene functions are altered after subtotal gastrectomy in patients with gastric cancer
Source: PubMed Central journal article supplement (PMC4748256; doi:10.1038/srep20701), 2016-02-10
Supplement: srep20701-s1.pdf [file srep20701-s1.pdf]

## Supplementary information

Gastric microbiota and predicted gene functions are altered after subtotal gastrectomy in patients with gastric cancer

Ching-Hung Tseng, Jaw-Town Lin, Hsiu J. Ho, Zi-Lun Lai, Chang-Bi Wang, Sen-Lin Tang\*,  
Chun-Ying Wu\*

\*Corresponding author

### Figure

**Figure S1** Rarefaction curves of gastric microbiota.

### Table

**Table S1** Gastric microbiota diversity indices based on 16S rRNA gene libraries.

**Table S2** List of COGs enriched in the gastric microbiota before surgery.

**Table S3** List of COGs enriched in the gastric microbiota after surgery.

**Table S4** Pathways enriched in the gastric microbiota before surgery.

**Table S5** Pathways enriched in the gastric microbiota after surgery.

**Figure**

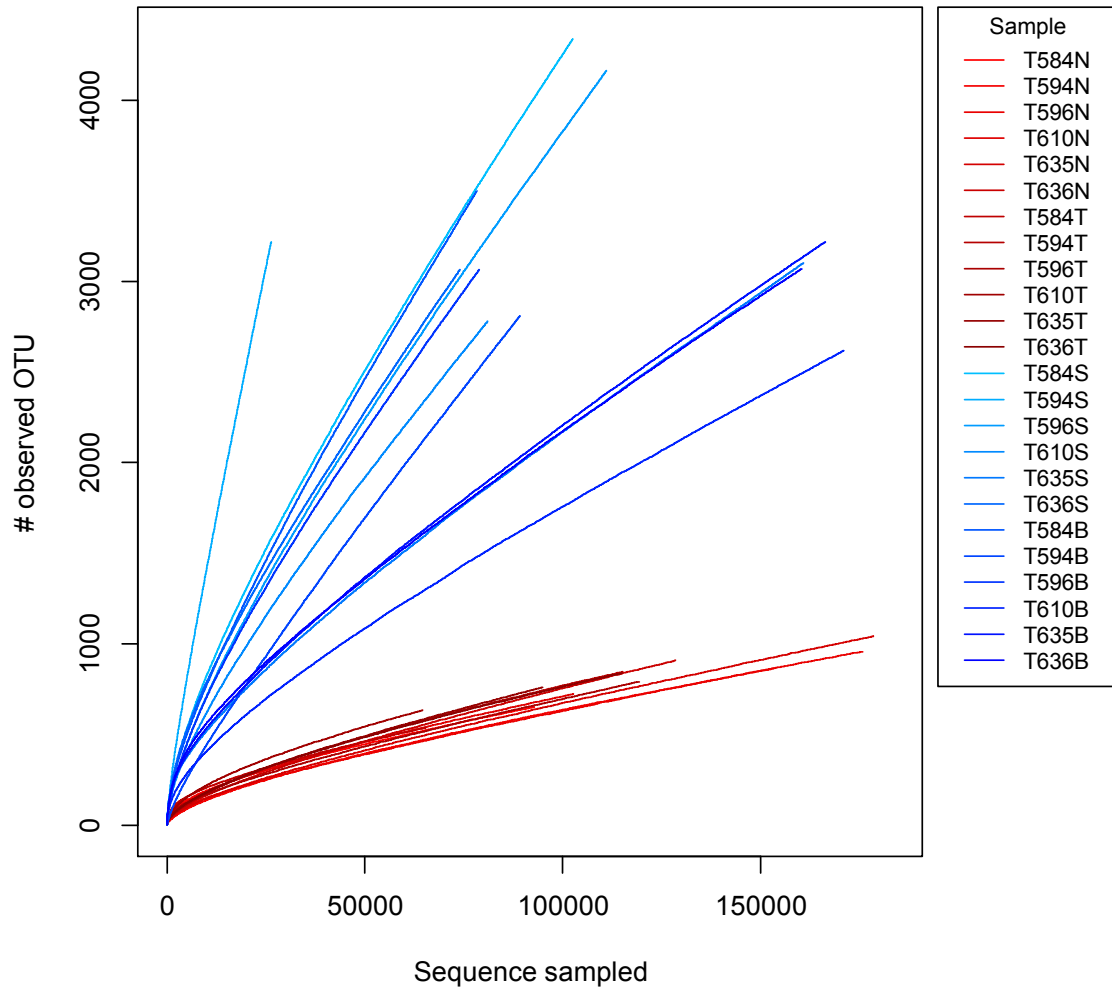

**Figure S1** Rarefaction curves of gastric microbiota.

## Table

**Table S1** Gastric microbiota diversity indices based on 16S rRNA gene libraries.

| Sample | # OTU <sup>a</sup> | # Singleton OTU | N      | Shannon | Simpson | Chao1 | Evenness <sup>b</sup> | Richness <sup>c</sup> | Good's coverage <sup>d</sup> |
|--------|--------------------|-----------------|--------|---------|---------|-------|-----------------------|-----------------------|------------------------------|
| T584N  | 651                | 415             | 92747  | 0.417   | 83.345  | 2.703 | 0.199                 | 2441                  | 0.996                        |
| T584T  | 537                | 318             | 65454  | 0.429   | 65.823  | 2.699 | 0.172                 | 1899                  | 0.995                        |
| T594N  | 864                | 634             | 153535 | 0.118   | 122.055 | 0.797 | 0.746                 | 4154                  | 0.996                        |
| T594T  | 845                | 571             | 115166 | 0.290   | 112.619 | 1.957 | 0.278                 | 3015                  | 0.995                        |
| T596N  | 957                | 725             | 175779 | 0.186   | 138.037 | 1.279 | 0.567                 | 5405                  | 0.996                        |
| T596T  | 791                | 572             | 119248 | 0.431   | 112.480 | 2.874 | 0.185                 | 3932                  | 0.995                        |
| T610N  | 723                | 481             | 102745 | 0.338   | 95.775  | 2.223 | 0.301                 | 2943                  | 0.995                        |
| T610T  | 633                | 393             | 64558  | 0.335   | 81.498  | 2.160 | 0.335                 | 2143                  | 0.994                        |
| T635N  | 1064               | 827             | 183477 | 0.154   | 156.927 | 1.075 | 0.670                 | 7274                  | 0.996                        |
| T635T  | 760                | 526             | 94884  | 0.350   | 105.481 | 2.324 | 0.168                 | 3415                  | 0.995                        |
| T636N  | 908                | 677             | 128482 | 0.295   | 132.320 | 2.010 | 0.257                 | 4224                  | 0.995                        |
| T636T  | 838                | 566             | 114976 | 0.342   | 111.647 | 2.301 | 0.182                 | 3298                  | 0.995                        |
| T584S  | 4338               | 3394            | 102556 | 0.539   | 677.116 | 4.513 | 0.039                 | 27370                 | 0.967                        |
| T584B  | 3500               | 2797            | 78326  | 0.555   | 571.323 | 4.529 | 0.032                 | 23656                 | 0.964                        |
| T594S  | 3219               | 2804            | 26306  | 0.589   | 634.155 | 4.754 | 0.040                 | 36522                 | 0.893                        |
| T594B  | 2810               | 2472            | 89216  | 0.139   | 499.147 | 1.103 | 0.747                 | 24625                 | 0.972                        |
| T596S  | 4162               | 3311            | 111021 | 0.453   | 656.042 | 3.775 | 0.072                 | 28409                 | 0.970                        |
| T596B  | 3065               | 2385            | 78906  | 0.480   | 486.818 | 3.857 | 0.073                 | 21646                 | 0.970                        |
| T610S  | 2779               | 2177            | 80992  | 0.496   | 443.318 | 3.931 | 0.073                 | 17962                 | 0.973                        |
| T610B  | 2638               | 2006            | 172740 | 0.465   | 382.824 | 3.666 | 0.084                 | 15956                 | 0.988                        |
| T635S  | 3102               | 2410            | 160856 | 0.597   | 462.696 | 4.796 | 0.018                 | 24928                 | 0.985                        |
| T635B  | 3217               | 2450            | 166380 | 0.557   | 469.058 | 4.501 | 0.034                 | 20659                 | 0.985                        |
| T636S  | 3065               | 2365            | 74015  | 0.555   | 485.489 | 4.459 | 0.059                 | 24735                 | 0.968                        |
| T636B  | 3069               | 2321            | 160396 | 0.522   | 445.709 | 4.191 | 0.077                 | 20782                 | 0.986                        |

<sup>a</sup>OTUs were defined at the 97% sequence identity level using 16S rRNA hypervariable regions V1-V3.

<sup>b</sup>Evenness was defined as Shannon/ln(# OTU).

<sup>c</sup>Richness was defined as (# singleton OTU-1)/log<sub>10</sub>N. The maximum value is (N-1)/log<sub>10</sub>N.

<sup>d</sup>Good's coverage was defined as 1-(# singleton OTU)/N.

**Table S2** List of COGs enriched in the gastric microbiota before surgery. The results were derived from the enrichment analysis using a gene-centric comparison between predicted gene functional profiles before and after surgery.

*Available as separate MS Excel file*

**Table S3** List of COGs enriched in the gastric microbiota after surgery. The results were derived from the enrichment analysis using a gene-centric comparison between predicted gene functional profiles before and after surgery.

*Available as separate MS Excel file*

**Table S4** Pathways enriched in the gastric microbiota before surgery. The results were derived from the enrichment analysis using a pathway-centric comparison between predicted gene functional profiles before and after surgery.

| Pathway category ID | Category size | Gene families found | Coefficient <sup>a</sup> | AIC <sup>b</sup> | Adjusted <i>P</i> (BH) | Category                                                      |
|---------------------|---------------|---------------------|--------------------------|------------------|------------------------|---------------------------------------------------------------|
| 16                  | 17            | 17                  | 0.026                    | 2245285.676      | 0                      | Tryptophan biosynthesis                                       |
| 6                   | 7             | 7                   | 0.037                    | 3196890.151      | 0                      | Pyruvate decarboxylation                                      |
| 17                  | 6             | 6                   | 0.041                    | 872557.635       | 0                      | Valine biosynthesis                                           |
| 49                  | 9             | 9                   | 0.045                    | 1742493.678      | 0                      | Lipid A biosynthesis                                          |
| 70                  | 701           | 691                 | 0.051                    | 108704817        | 0                      | General function prediction only                              |
| 57                  | 270           | 270                 | 0.051                    | 50221848.777     | 0                      | Amino acid transport and metabolism                           |
| 67                  | 203           | 194                 | 0.069                    | 27463190.444     | 0                      | Posttranslational modification, protein turnover, chaperones  |
| 60                  | 179           | 179                 | 0.101                    | 27372115.311     | 0                      | Coenzyme transport and metabolism                             |
| 63                  | 230           | 210                 | 0.112                    | 51839580.910     | 0                      | Transcription                                                 |
| 7                   | 16            | 16                  | 0.115                    | 3678208.489      | 0                      | TCA cycle                                                     |
| 32                  | 16            | 16                  | 0.140                    | 3912033.215      | 0                      | Menaquinone biosynthesis                                      |
| 23                  | 4             | 4                   | 0.158                    | 585211.766       | 0                      | Entner-Doudoroff pathway                                      |
| 14                  | 5             | 5                   | 0.193                    | 841231.444       | 0                      | Proline biosynthesis                                          |
| 73                  | 158           | 148                 | 0.198                    | 27738034.456     | 0                      | Intracellular trafficking, secretion, and vesicular transport |
| 55                  | 258           | 256                 | 0.206                    | 52309915.139     | 0                      | Energy production and conversion                              |
| 31                  | 14            | 14                  | 0.209                    | 2593053.542      | 0                      | Heme biosynthesis                                             |
| 37                  | 15            | 15                  | 0.209                    | 3593067.217      | 0                      | Ubiquinone biosynthesis                                       |
| 46                  | 69            | 69                  | 0.234                    | 32688753.934     | 0                      | Transcriptional regulators                                    |
| 27                  | 6             | 6                   | 0.242                    | 703009.960       | 0                      | Biotin biosynthesis                                           |
| 72                  | 152           | 147                 | 0.259                    | 32152847.110     | 0                      | Signal transduction mechanisms                                |
| 30                  | 9             | 9                   | 0.280                    | 1362369.950      | 0                      | FAD biosynthesis                                              |
| 35                  | 7             | 7                   | 0.299                    | 905013.940       | 0                      | Riboflavin biosynthesis                                       |
| 61                  | 94            | 94                  | 0.461                    | 26072733.063     | 0                      | Lipid transport and metabolism                                |
| 5                   | 15            | 15                  | 0.518                    | 2230580.452      | 0                      | NADH:Ubiquinone oxidoreductase subunits                       |
| 54                  | 19            | 18                  | 0.520                    | 350586.347       | 0                      | Chromatin structure and dynamics                              |
| 66                  | 96            | 95                  | 0.563                    | 28142388.630     | 0                      | Cell motility                                                 |
| 39                  | 13            | 13                  | 0.601                    | 5870388.272      | 0                      | Fatty acid biosynthesis                                       |
| 52                  | 8             | 8                   | 0.731                    | 624319.101       | 0                      | Multisubunit NA <sup>+</sup> /H <sup>+</sup> antiporter       |
| 50                  | 33            | 33                  | 0.762                    | 12203265.587     | 0                      | Flagellum structure and biogenesis                            |
| 69                  | 88            | 88                  | 0.784                    | 17039862.308     | 0                      | Secondary metabolites biosynthesis, transport and catabolism  |
| 53                  | 25            | 22                  | 1.339                    | 643370.497       | 0                      | RNA processing and modification                               |
| 3                   | 2             | 2                   | 1.432                    | 347301.623       | 0                      | Glyoxylate bypass                                             |
| 77                  | 12            | 9                   | 1.472                    | 282637.313       | 0                      | Cytoskeleton                                                  |
| 29                  | 9             | 9                   | 0.025                    | 1326309.589      | 6.33E-197              | Coenzyme A biosynthesis                                       |
| 28                  | 18            | 18                  | 0.033                    | 2080308.663      | 9.86E-185              | Cobalamin biosynthesis                                        |
| 34                  | 8             | 8                   | 0.023                    | 1334633.803      | 8.84E-113              | Pyridoxal phosphate biosynthesis                              |
| 10                  | 6             | 6                   | 0.020                    | 1154756.679      | 4.61E-103              | Isoleucine biosynthesis                                       |
| 8                   | 11            | 11                  | 0.014                    | 1973872.842      | 5.72E-69               | Arginine biosynthesis                                         |
| 36                  | 10            | 10                  | 0.014                    | 2520574.682      | 3.88E-56               | Thiamine biosynthesis                                         |

<sup>a</sup>The coefficient is the estimated difference between the two groups (*i.e.*, before and after surgery) using Poisson model. Positive value indicates more abundance before surgery.

<sup>b</sup>The Akaike Information Criterion (AIC) represents a measure of the model fit.

**Table S5** Pathways enriched in the gastric microbiota after surgery. The results were derived from the enrichment analysis using a pathway-centric comparison between predicted gene functional profiles before and after surgery.

| Pathway category ID | Category size | Gene families found | Coefficient <sup>a</sup> | AIC <sup>b</sup> | Adjusted <i>P</i> (BH) | Category                                                     |
|---------------------|---------------|---------------------|--------------------------|------------------|------------------------|--------------------------------------------------------------|
| 45                  | 15            | 15                  | -0.049                   | 2416544.135      | 0                      | DNA-dependent RNA polymerase subunits                        |
| 38                  | 5             | 5                   | -0.049                   | 782934.292       | 0                      | Deoxyxylulose pathway of terpenoid biosynthesis              |
| 68                  | 212           | 211                 | -0.057                   | 40662745.992     | 0                      | Inorganic ion transport and metabolism                       |
| 65                  | 188           | 188                 | -0.072                   | 44064943.076     | 0                      | Cell wall/membrane/envelope biogenesis                       |
| 13                  | 14            | 14                  | -0.077                   | 2064159.447      | 0                      | Phenylalanine/tyrosine biosynthesis                          |
| 2                   | 9             | 9                   | -0.077                   | 1276782.166      | 0                      | F0F1-type ATP synthase subunits                              |
| 71                  | 1347          | 1338                | -0.084                   | 126047044.850    | 0                      | Function unknown                                             |
| 44                  | 11            | 11                  | -0.090                   | 593709.183       | 0                      | Basal transcription factors                                  |
| 24                  | 14            | 14                  | -0.093                   | 2534894.804      | 0                      | Gluconeogenesis                                              |
| 40                  | 26            | 26                  | -0.098                   | 2953535.462      | 0                      | Aminoacyl-tRNA synthetases and alternate systems             |
| 15                  | 5             | 5                   | -0.121                   | 694831.082       | 0                      | Threonine biosynthesis                                       |
| 26                  | 9             | 9                   | -0.121                   | 1428890.307      | 0                      | Pentose phosphate pathway                                    |
| 22                  | 9             | 9                   | -0.129                   | 1376804.125      | 0                      | Thymidylate biosynthesis                                     |
| 20                  | 14            | 14                  | -0.129                   | 1827467.630      | 0                      | Pyrimidine biosynthesis                                      |
| 51                  | 9             | 9                   | -0.129                   | 1070802.985      | 0                      | Preprotein translocase subunits                              |
| 56                  | 72            | 66                  | -0.139                   | 7219559.122      | 0                      | Cell cycle control, cell division, chromosome                |
| 64                  | 238           | 232                 | -0.187                   | 48914696.065     | 0                      | Replication, recombination and repair                        |
| 41                  | 51            | 51                  | -0.189                   | 3824023.524      | 0                      | Ribosomal proteins - large subunit                           |
| 48                  | 8             | 8                   | -0.191                   | 1257047.516      | 0                      | DNA polymerase III subunits                                  |
| 42                  | 32            | 32                  | -0.196                   | 2503329.155      | 0                      | Ribosomal proteins - small subunit                           |
| 43                  | 22            | 22                  | -0.198                   | 1251032.039      | 0                      | Translation factors and enzymes involved in translation      |
| 62                  | 245           | 242                 | -0.209                   | 19923262.598     | 0                      | Translation, ribosomal structure and biogenesis              |
| 59                  | 229           | 229                 | -0.214                   | 47873448.357     | 0                      | Carbohydrate transport and metabolism                        |
| 12                  | 10            | 10                  | -0.215                   | 1517791.528      | 0                      | Methionine biosynthesis                                      |
| 25                  | 14            | 14                  | -0.226                   | 3078255.079      | 0                      | Glycolysis                                                   |
| 74                  | 46            | 46                  | -0.233                   | 13431794.355     | 0                      | Defense mechanisms                                           |
| 47                  | 26            | 26                  | -0.244                   | 2938347.734      | 0                      | Basal replication machinery                                  |
| 58                  | 95            | 95                  | -0.276                   | 17275668.498     | 0                      | Nucleotide transport and metabolism                          |
| 18                  | 18            | 18                  | -0.313                   | 2701319.583      | 0                      | Purine biosynthesis                                          |
| 21                  | 10            | 10                  | -0.339                   | 2360392.014      | 0                      | Pyrimidine salvage                                           |
| 19                  | 5             | 5                   | -0.407                   | 1344170.387      | 0                      | Purine salvage                                               |
| 1                   | 9             | 9                   | -1.321                   | 680246.810       | 0                      | Archaeal/Vacuolar-type H <sup>+</sup> ATPase subunits        |
| 4                   | 7             | 7                   | -2.002                   | 686183.325       | 0                      | NA <sup>+</sup> -transporting NADH:Ubiquinone oxidoreductase |
| 11                  | 10            | 10                  | -0.020                   | 1929078.688      | 6.85E-135              | Leucine biosynthesis                                         |
| 9                   | 12            | 12                  | -0.018                   | 1966818.357      | 1.11E-85               | Histidine biosynthesis                                       |
| 33                  | 7             | 7                   | -0.013                   | 911748.5012      | 6.04E-34               | NAD biosynthesis                                             |

<sup>a</sup>The coefficient is the estimated difference between the two groups (*i.e.*, before and after surgery) using Poisson model. Negative value indicates more abundance after surgery.

<sup>b</sup>The Akaike Information Criterion (AIC) represents a measure of the model fit.
